# Supplementary figures and images for: Animal-like prostaglandins in marine microalgae
Source: PubMed Central journal article supplement — ISME J. 2017 Mar 28;11(7):1722–6. doi: 10.1038/ismej.2017.27 (PMC5520147; doi:10.1038/ismej.2017.27), 2017-03-28

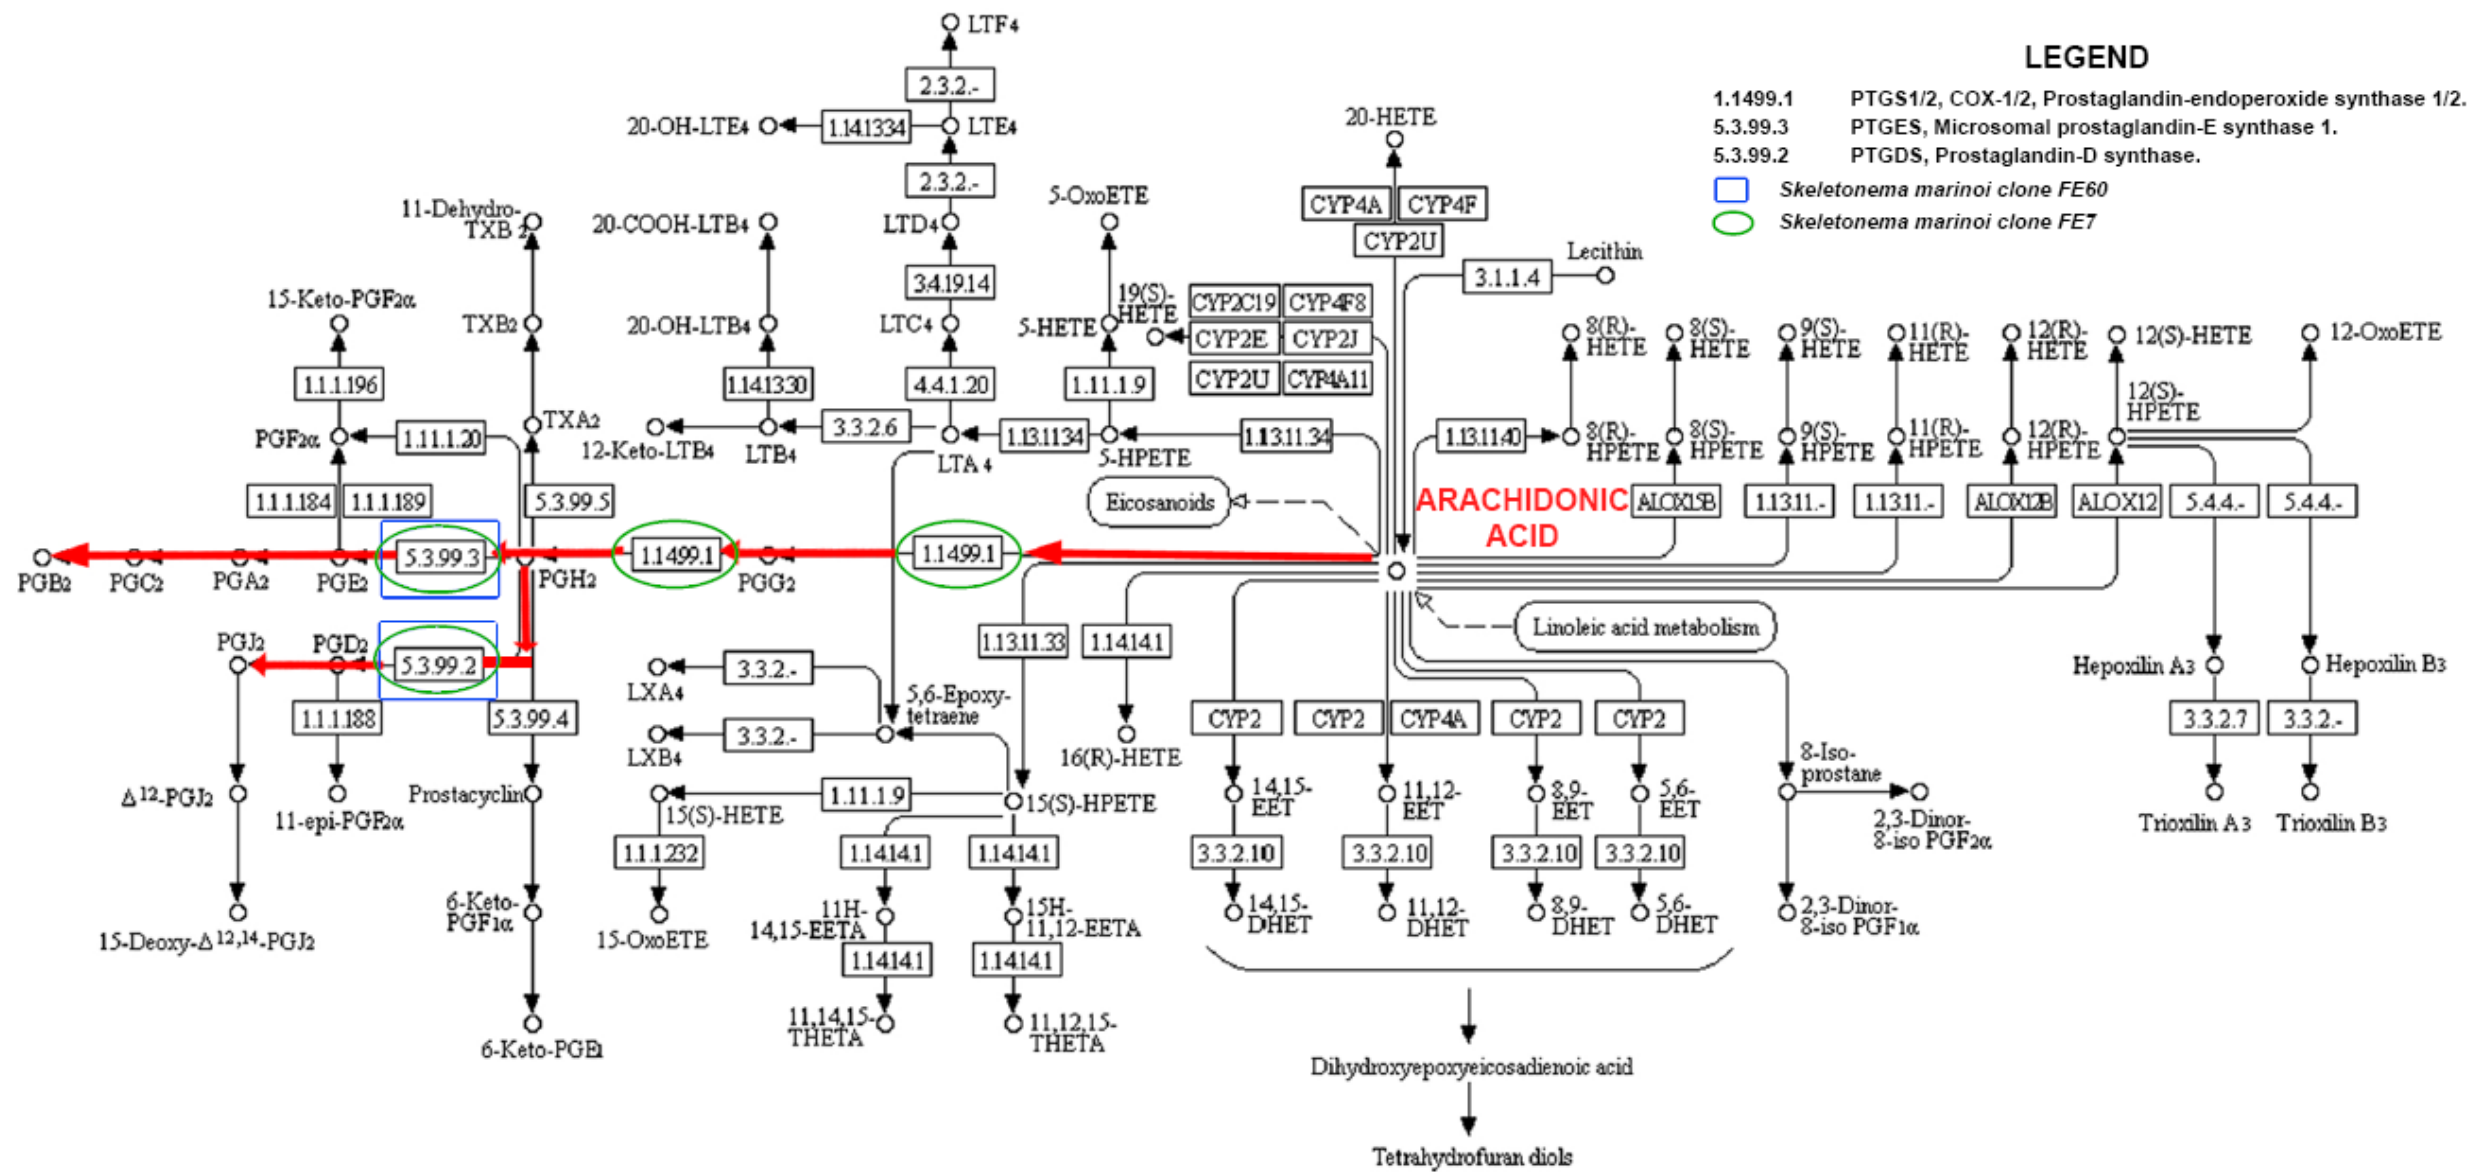

Supplement: ismej201727x3.pdf [file ismej201727x3.pdf]

**A**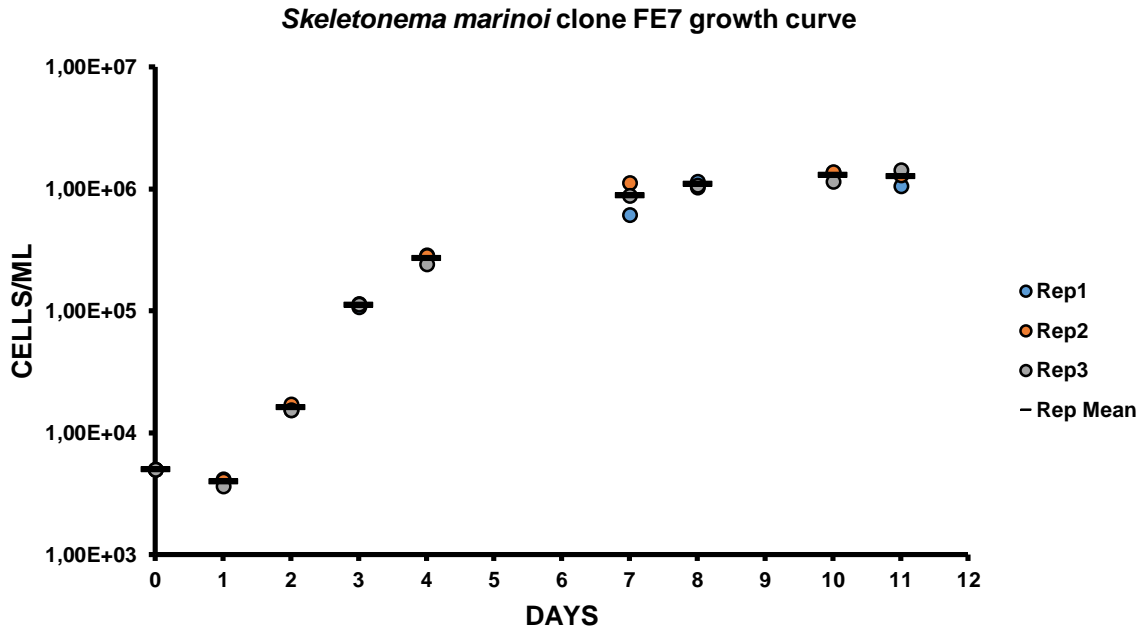**B**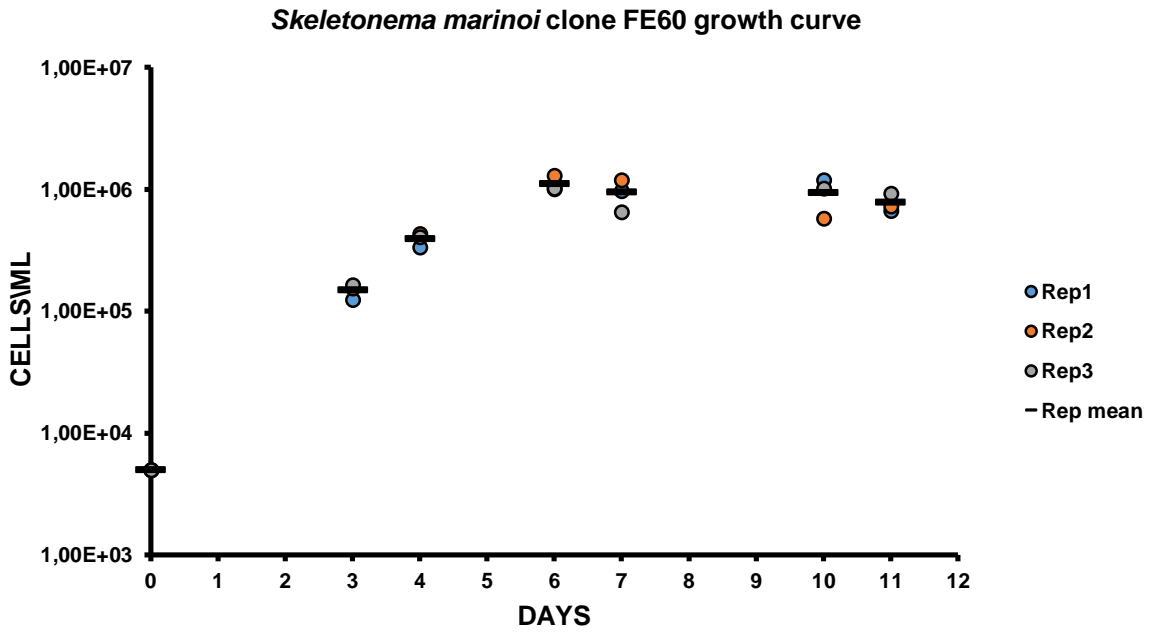

Supplement: ismej201727x4.pdf [file ismej201727x4.pdf]

x10<sup>2</sup> -ESI MRM

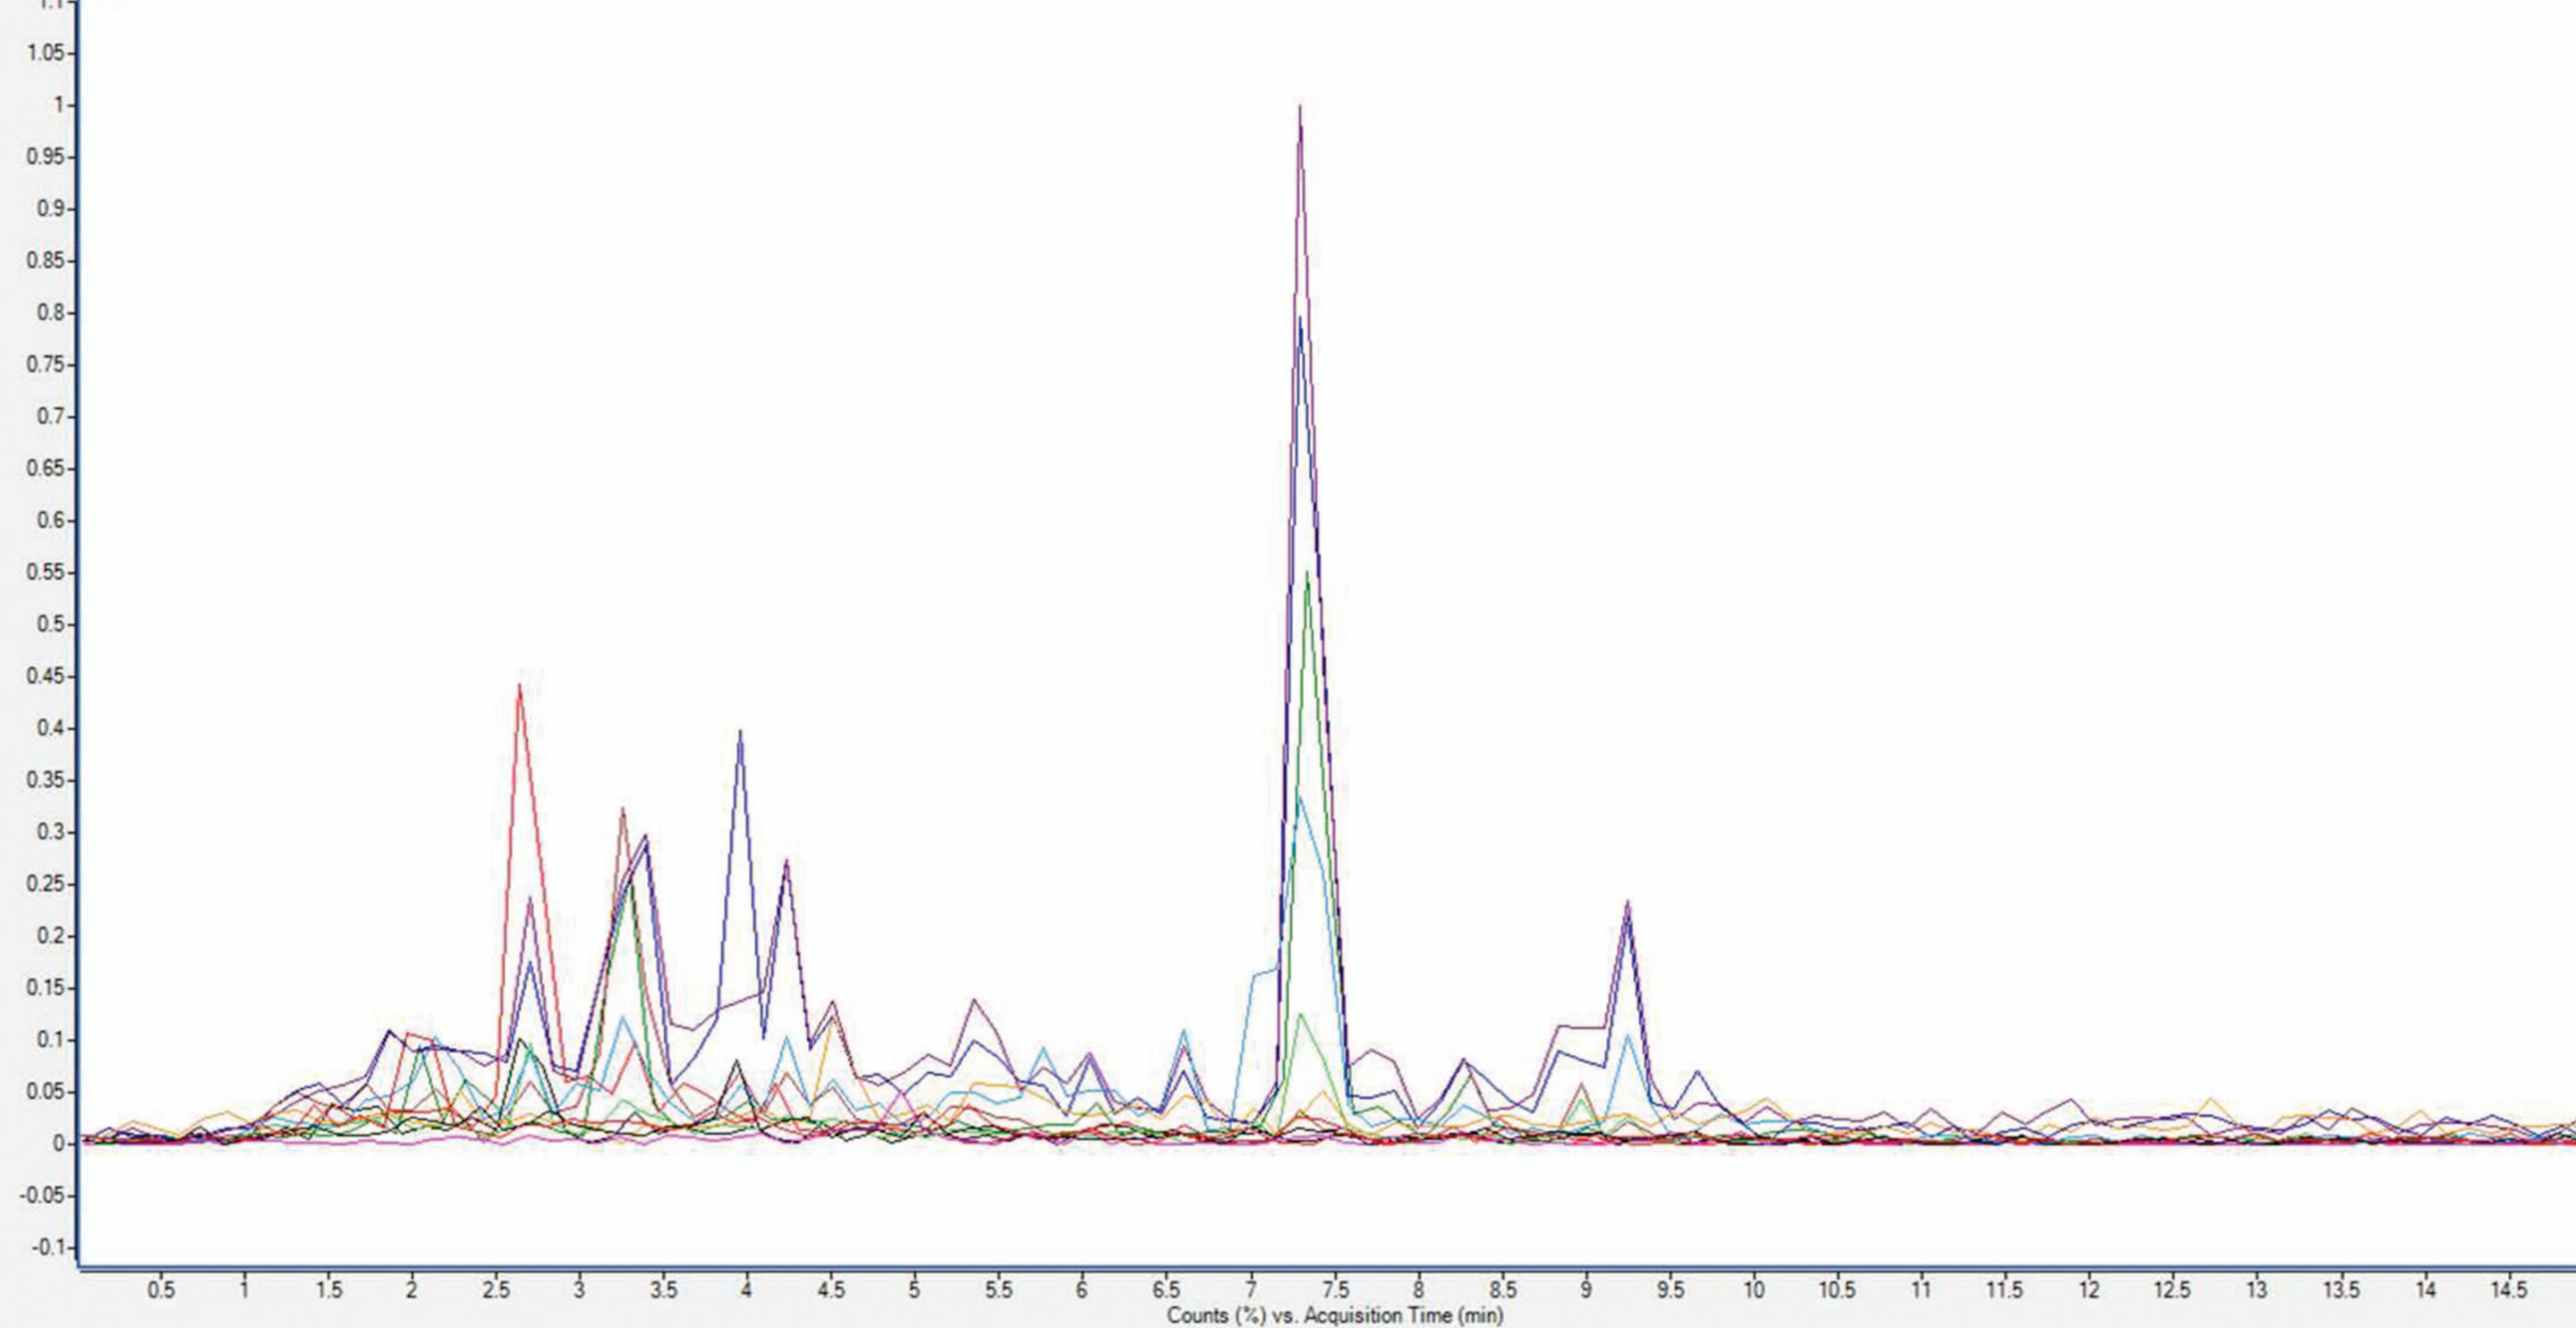

Supplement: ismej201727x5.pdf [file ismej201727x5.pdf]

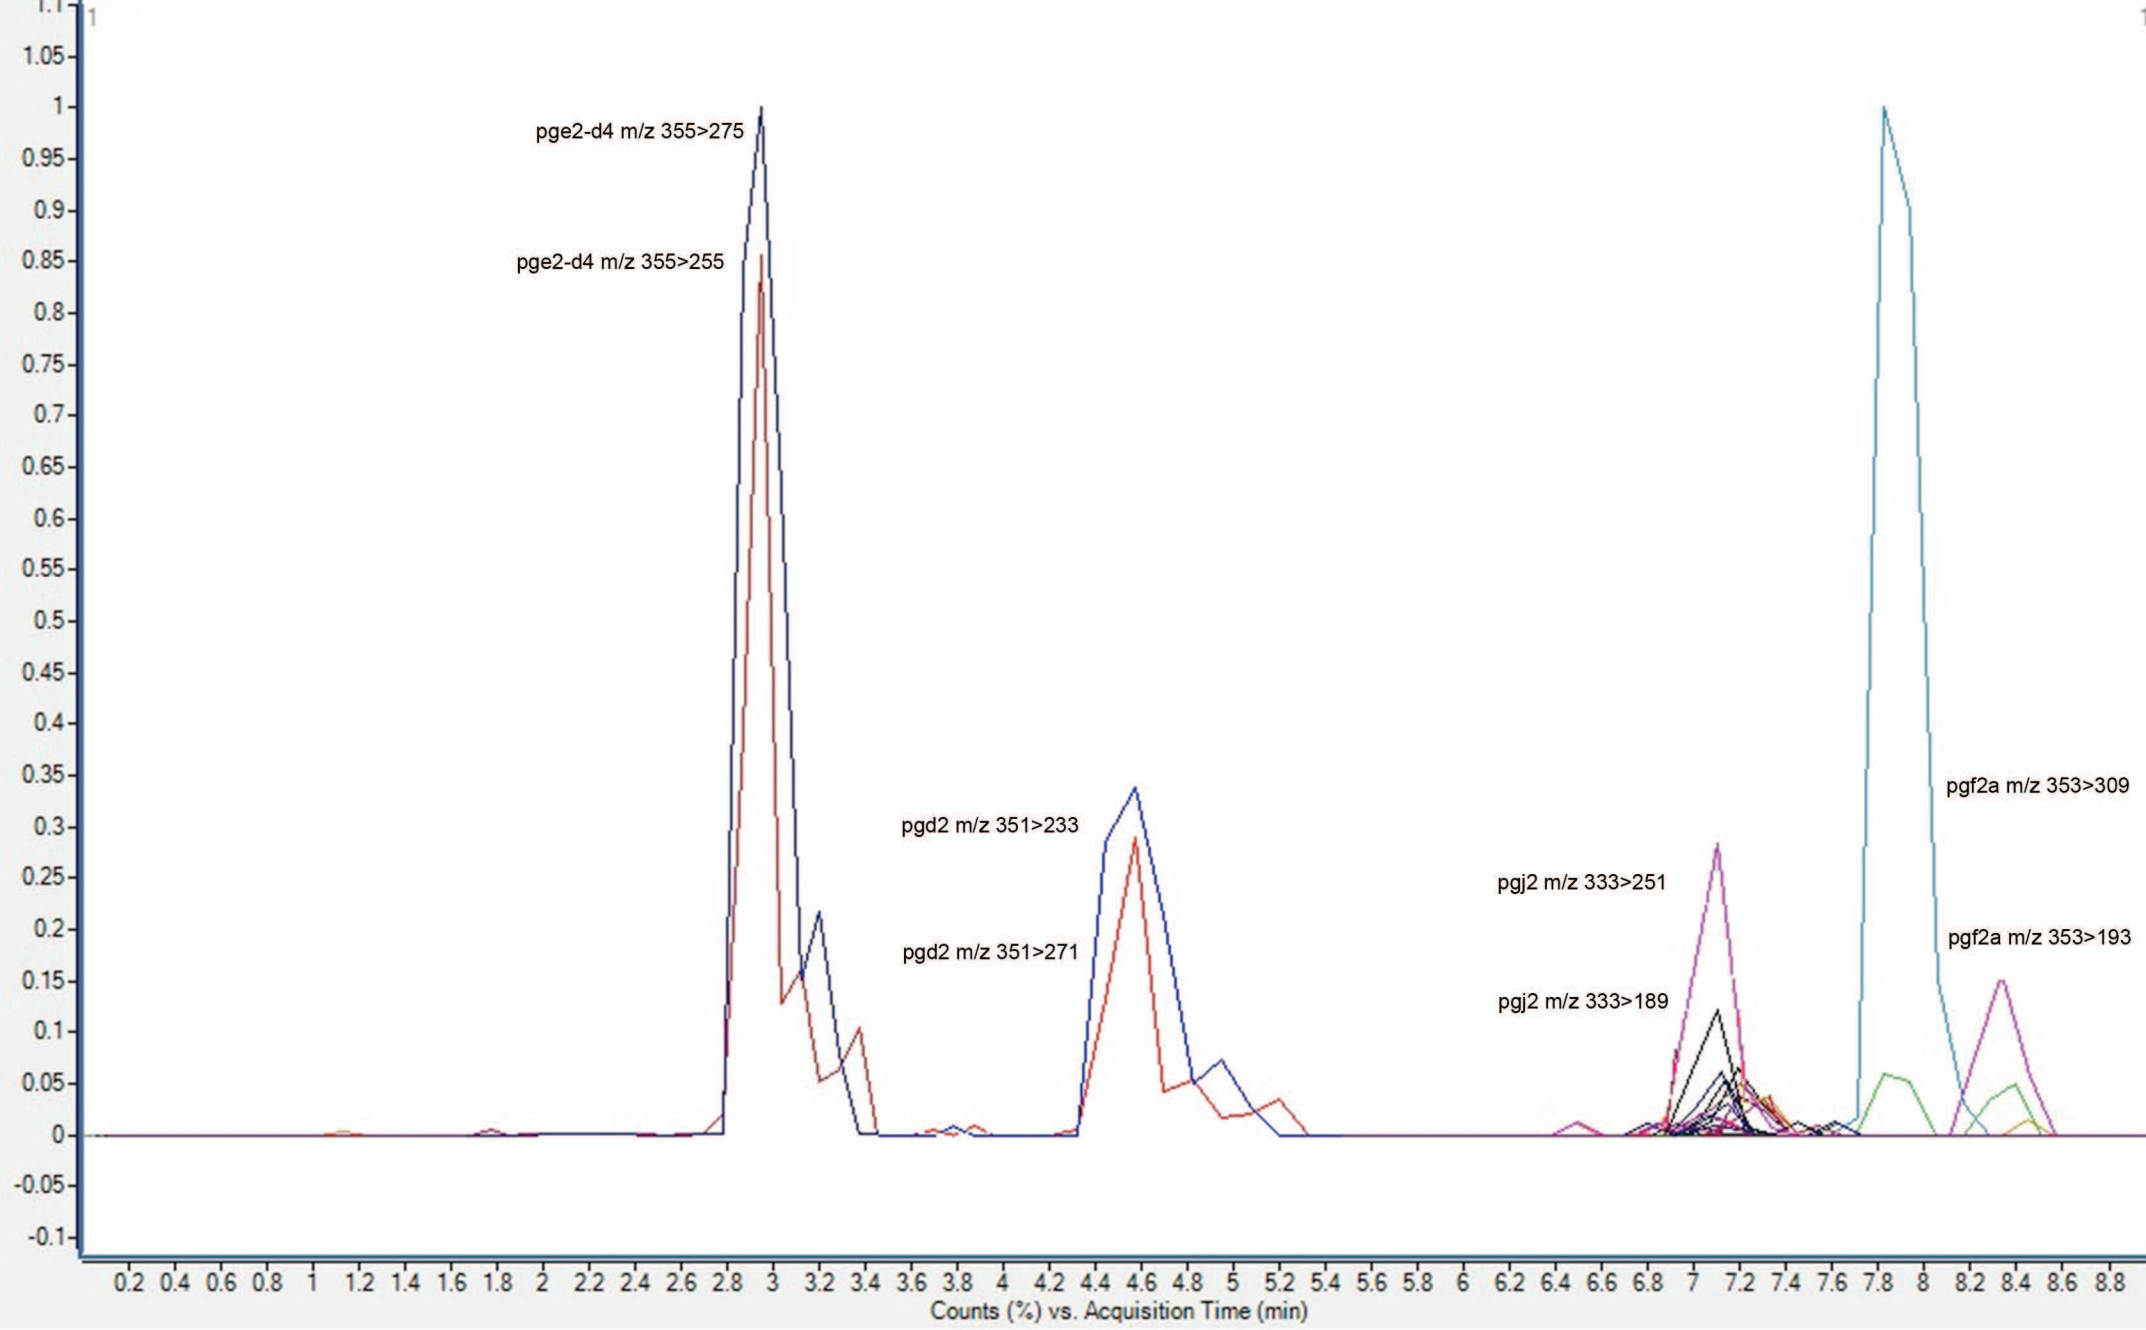

Supplement: ismej201727x6.pdf [file ismej201727x6.pdf]

# FE7 SILICA STARVATION vs COMPLETE MEDIUM

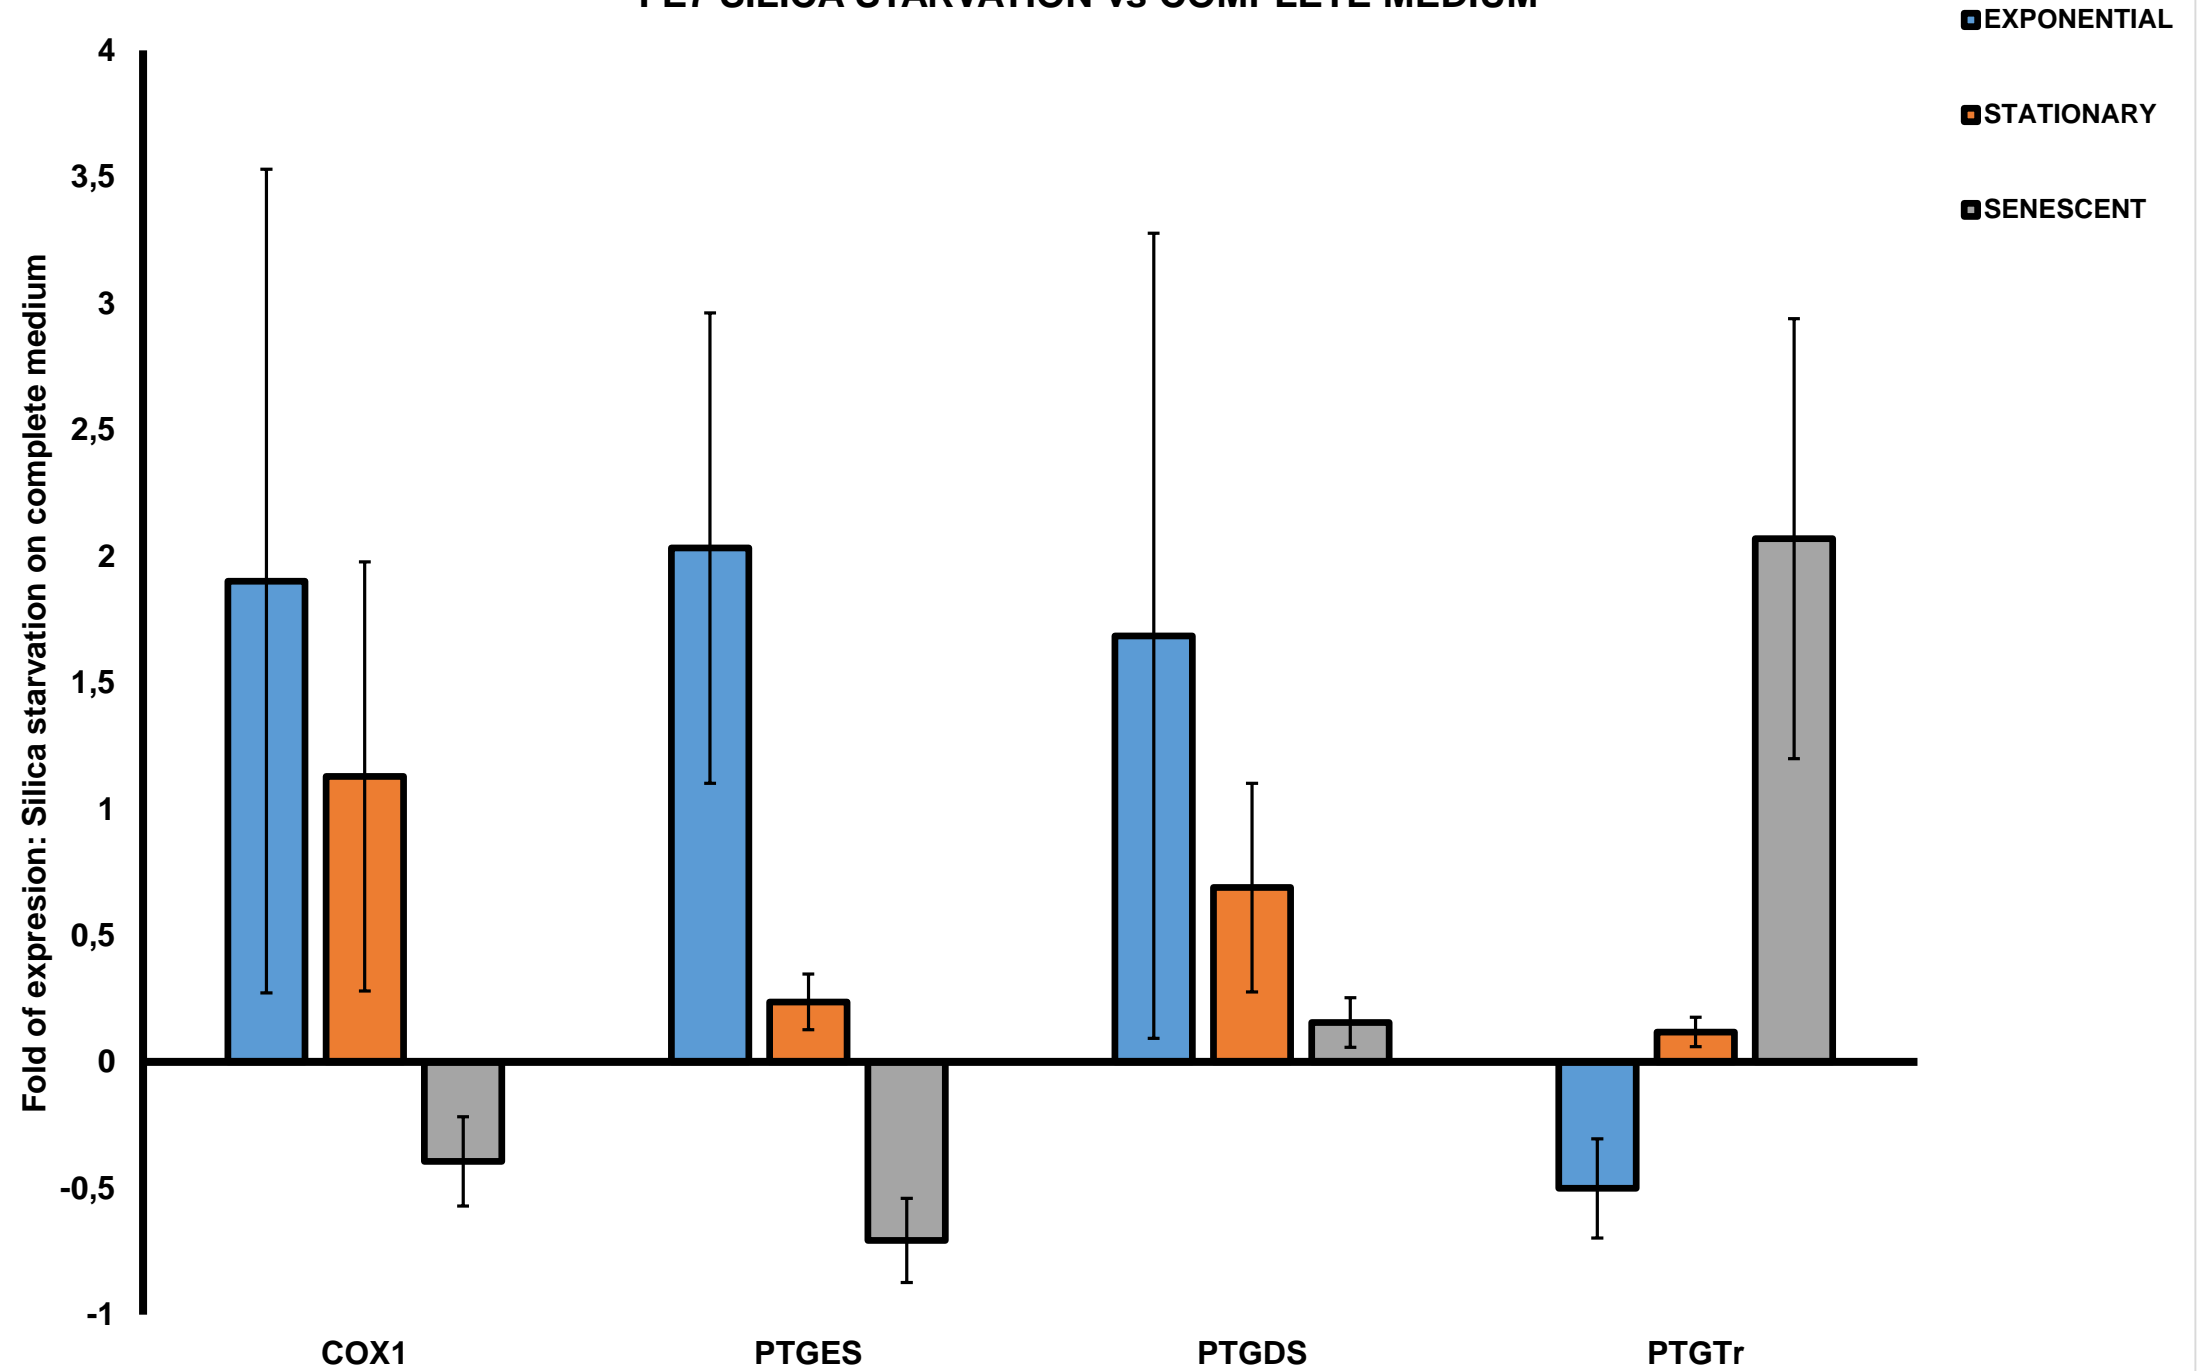

Supplement: ismej201727x7.pdf [file ismej201727x7.pdf]

# ClustalX2 COX Alignment

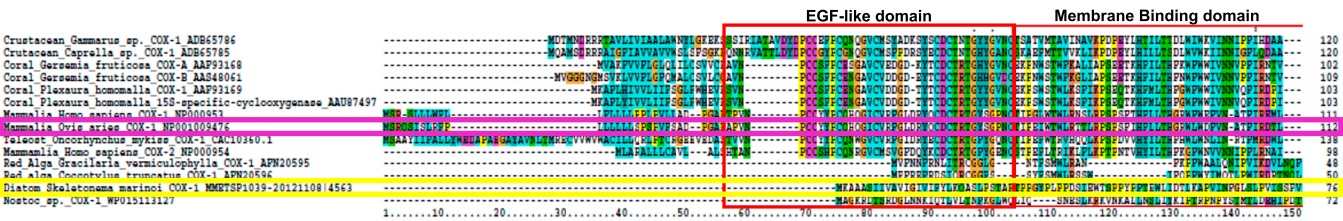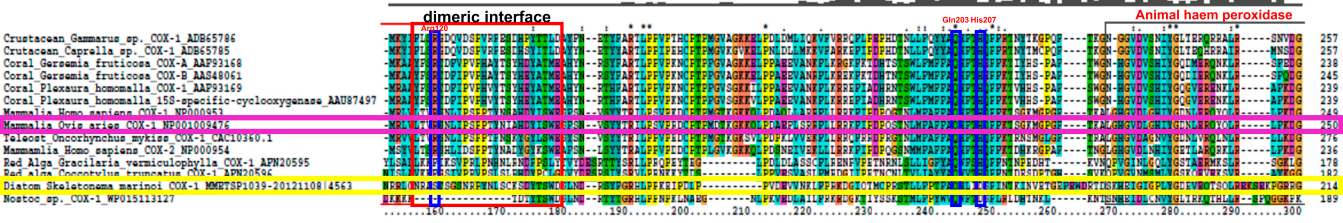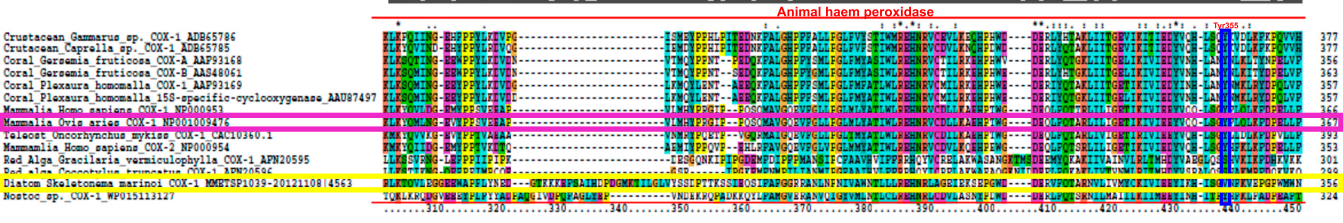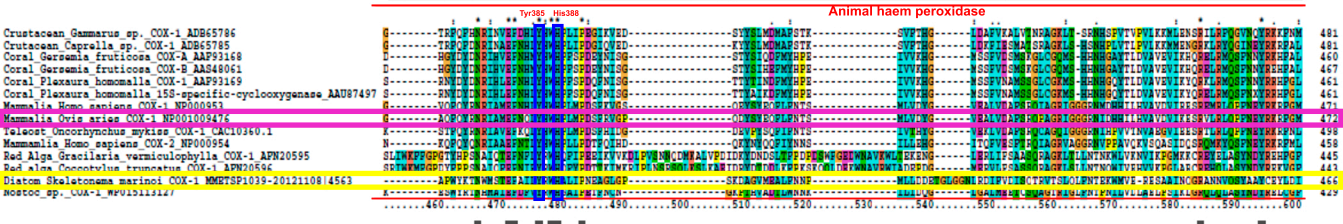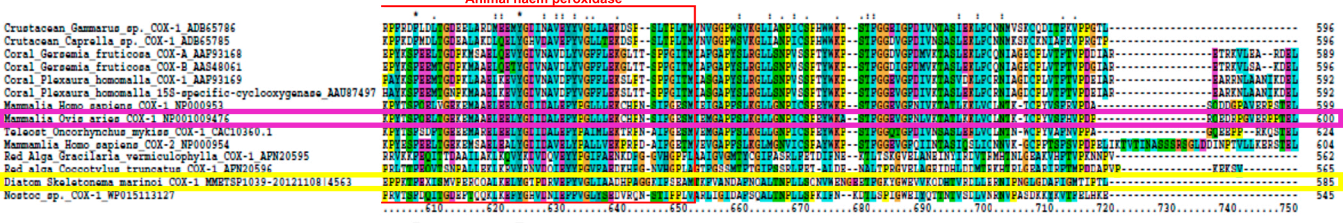

Supplement: ismej201727x8.pdf [file ismej201727x8.pdf]

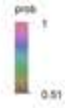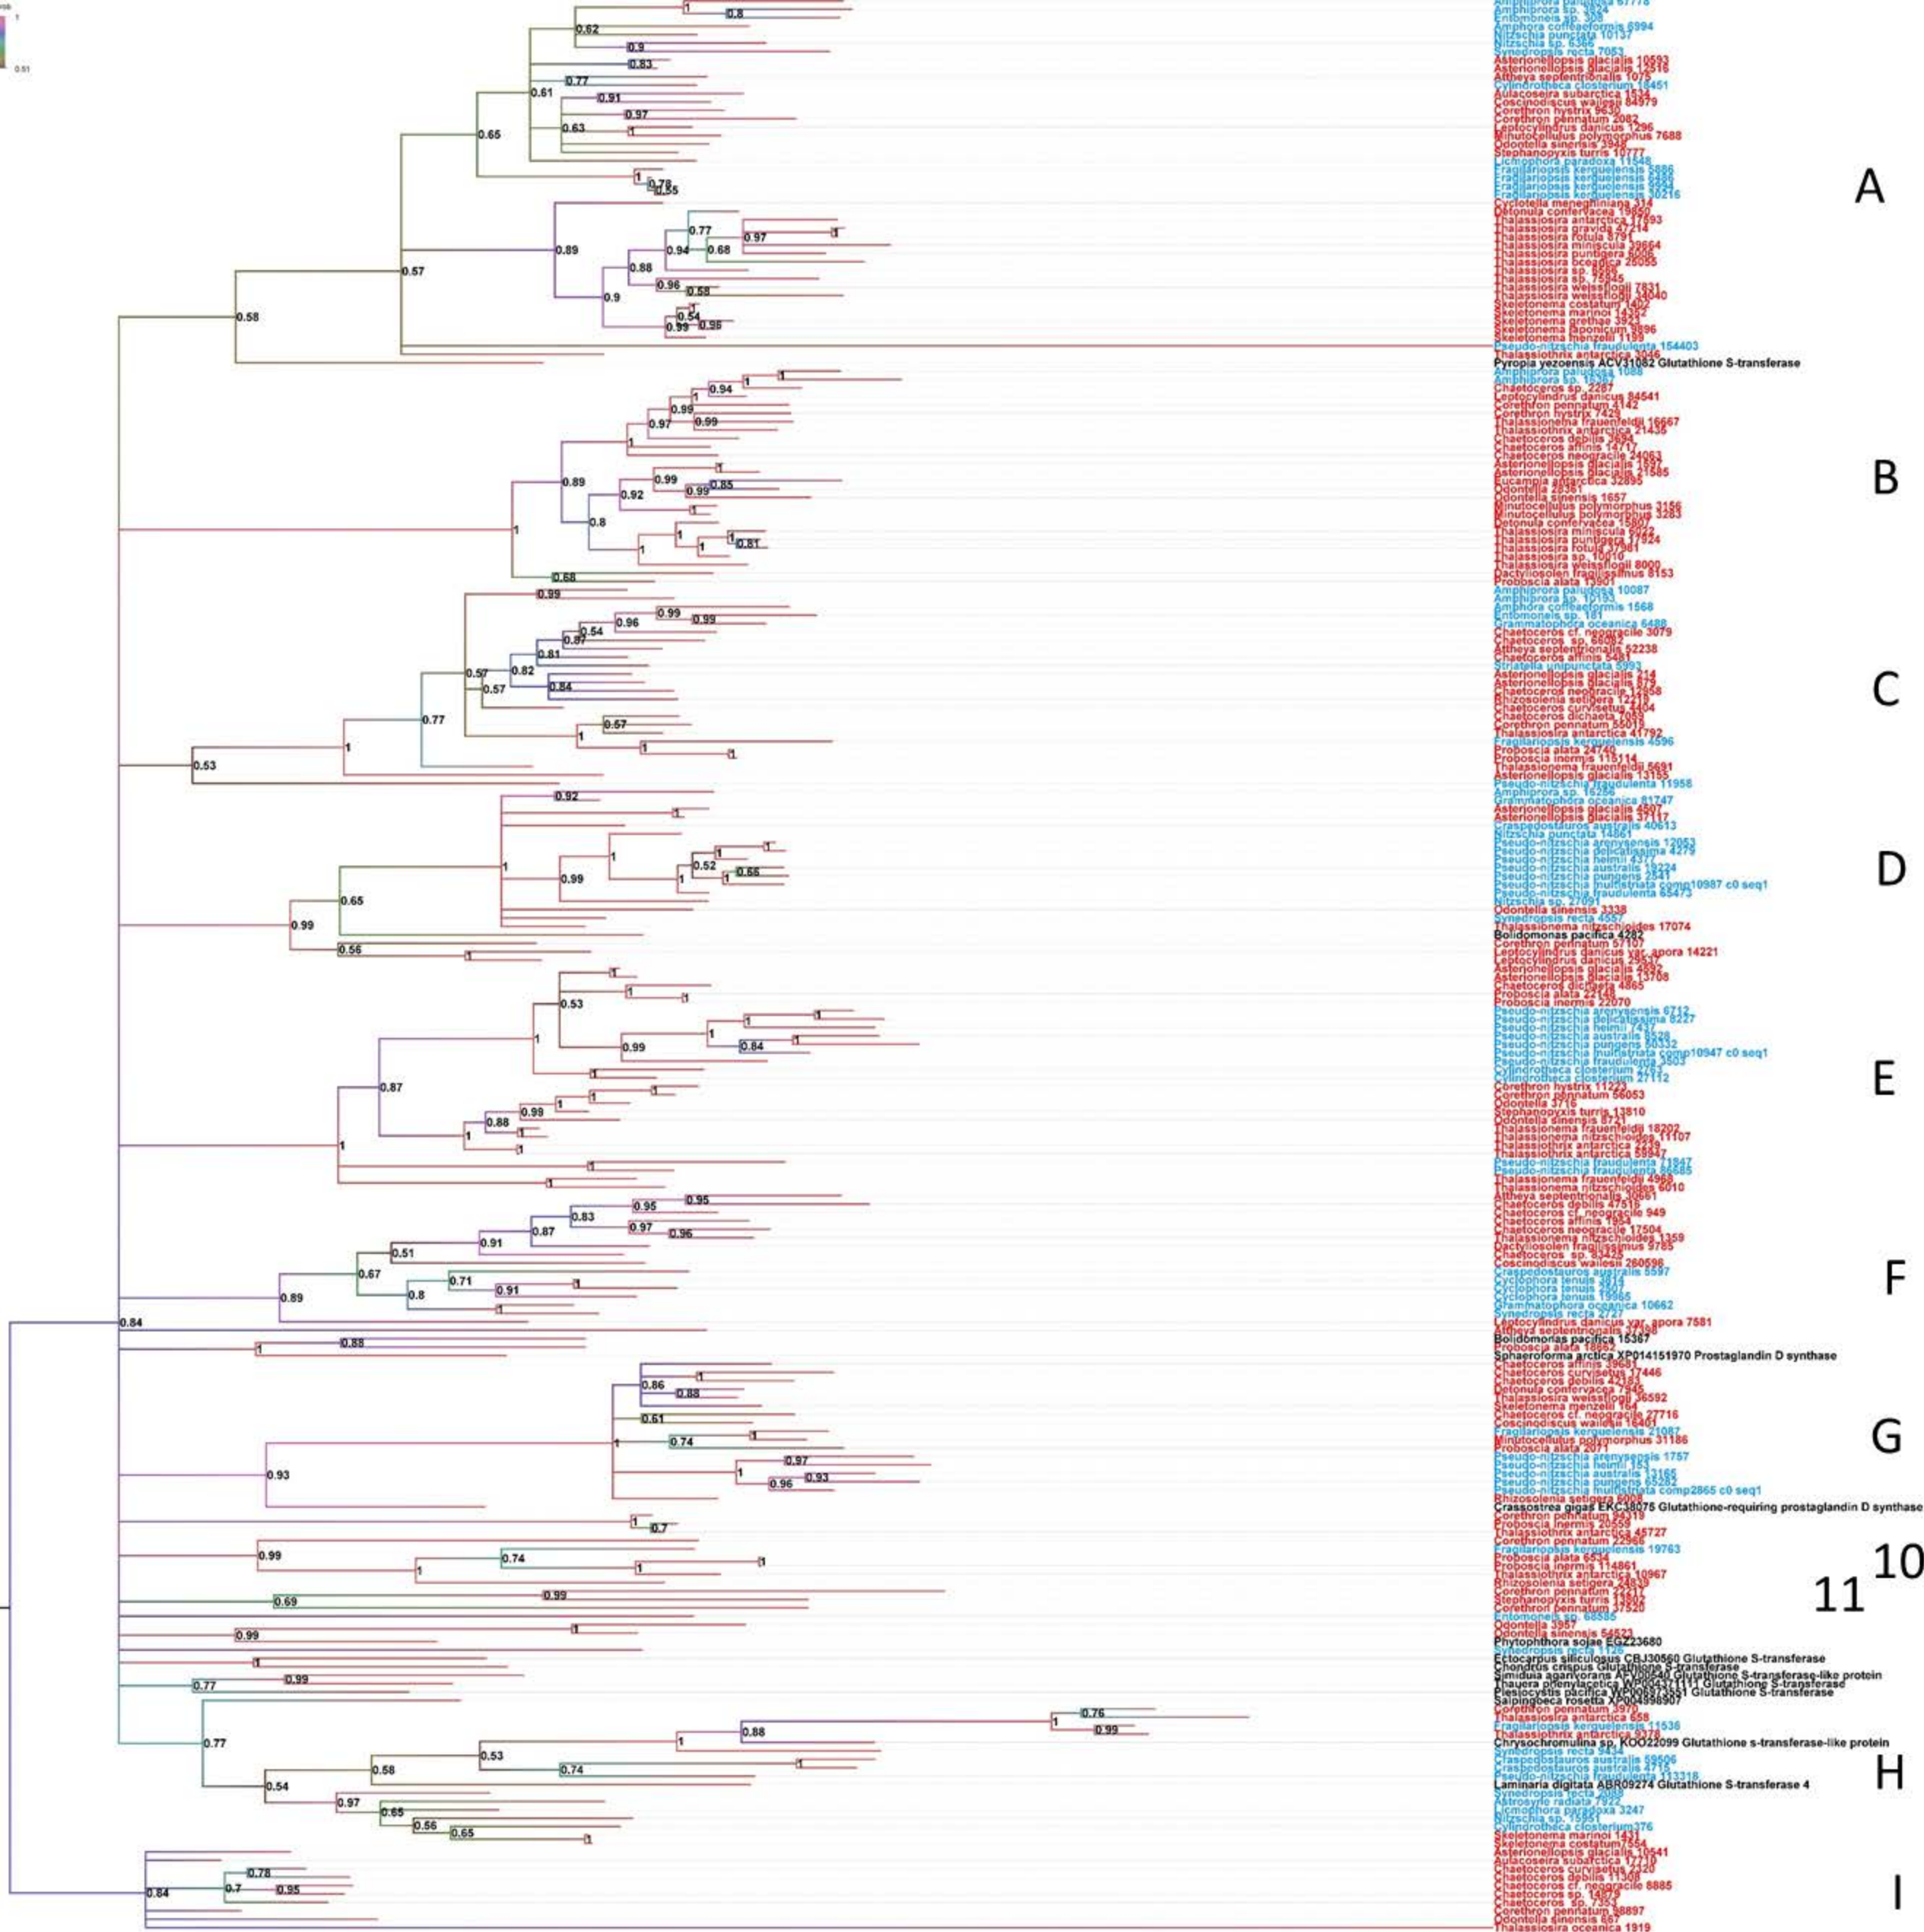

A

B

C

D

E

F

G

10

11

H

I

Supplement: ismej201727x9.pdf [file ismej201727x9.pdf]
